# Supplementary material for: Genotyping tools and resources to assess peanut germplasm: smut-resistant landraces as a case study
Source: PeerJ. 2021 Jan 29;9:e10581. doi: 10.7717/peerj.10581 (PMC7849506; doi:10.7717/peerj.10581)
Supplement: Supplemental Information 6 [file peerj-09-10581-s006.xlsx]

## Sheet: Table_S2_corrected
Genotype	Incidence (%)	Disease index	AX-147232553	AX-147232560	AX-147244129	AX-147244226	AX-147244277	AX-147244292	AX-147259639	AX-176791379	AX-176805643	AX-176809180	AX-176816134	AX-176821705	AX-177638329	AX-177642365	AX-177642482	AX-177643001	AX-177644036	AX-147207636	AX-147207665	AX-176792207	AX-176807872	AX-176795742	AX-176811528	AX-176814255	AX-147265651	AX-176792938	AX-176805140	AX-147207857	AX-147207858	AX-147207860	AX-147207862	AX-176794931	AX-176809096	AX-176804784	AX-176809216	AX-176819903	AX-176803117	AX-176796236	AX-176813014	AX-176795997	AX-176795191	AX-176822073	AX-176803706	AX-176823941	AX-176821805	AX-176822429	AX-176806214
I-3	4.5	0.032	0	0	0	0	2	2	0	0	2	2	0	0	0	2	0	0	2	0	0	0	2	0	0	0	2	2	0	0	0	2	2	2	0	2	0	2	2	0	2	0	0	2	2	2	2	0	0
I-4	32.52	0.237	0	0	0	0	2	2	2	0	2	2	0	0	2	2	2	2	0	0	0	0	2	0	0	0	2	2	0	0	0	2	2	2	0	2	0	2	2	0	2	0	0	2	2	2	2	0	0
I-5	2.28	0.02	0	0	2	2	0	0	0	2	2	2	2	2	0	2	0	0	2	2	0	0	2	2	2	2	0	0	2	0	0	2	2	0	.	2	0	0	2	0	0	2	2	0	2	0	0	2	2
I-6	14.6	0.107	0	0	0	.	.	.	0	.	2	2	.	.	0	2	0	0	2	2	0	0	2	2	2	2	0	0	2	2	2	0	0	0	2	0	2	2	0	2	0	2	2	0	0	0	0	2	2
I-7	13.8	0.1	0	0	0	0	2	2	0	0	2	2	0	0	0	2	0	0	2	0	2	2	0	0	0	0	2	2	0	2	2	0	0	2	2	0	2	0	0	2	2	0	0	2	0	2	2	0	0
I-8	8.75	0.057	2	2	0	0	2	2	2	0	0	0	0	0	2	0	2	2	0	2	2	2	0	2	2	2	0	0	2	2	2	0	0	2	2	0	2	0	0	2	2	0	0	2	0	2	2	0	0
I-10	15.85	0.097	0	0	0	0	2	2	2	0	2	2	0	0	2	2	2	2	0	2	2	2	0	2	2	2	0	0	2	2	2	0	0	0	2	0	2	0	0	2	0	2	0	2	0	2	2	0	0
I-11	25.22	0.177	0	0	0	0	2	2	2	0	2	2	0	0	2	2	2	2	0	0	0	0	2	0	0	0	2	2	0	0	0	2	2	2	0	2	0	0	2	0	0	2	0	2	2	2	2	0	0
I-12	4.98	0.033	2	2	.	0	2	2	0	0	0	0	0	0	0	0	0	0	2	0	0	0	2	.	.	.	2	.	.	0	0	2	2	2	0	2	0	2	2	0	2	0	0	2	2	2	2	0	0
I-14	3.62	0.023	0	0	2	2	0	0	0	2	2	2	2	2	0	2	0	0	2	2	0	0	2	2	2	2	0	0	2	0	0	2	2	0	2	0	2	2	0	2	0	2	2	0	0	0	0	2	2
I-16	1.7	0.01	2	2	2	2	0	0	0	2	0	0	2	2	0	0	0	0	2	0	2	2	0	0	0	0	2	2	0	2	2	0	0	2	2	0	2	0	0	2	2	0	0	2	0	2	2	0	0
I-17	16.44	0.117	0	0	0	0	2	2	0	0	.	.	0	0	0	.	0	0	2	0	2	2	0	0	0	0	2	2	0	2	2	0	0	2	2	0	2	2	0	2	2	0	0	2	0	2	2	0	0
I-18	0.87	0.003	2	2	2	2	0	0	0	2	0	0	2	2	0	0	0	0	2	2	0	0	2	2	2	2	0	0	2	0	0	2	2	0	0	2	0	2	2	0	0	2	2	0	2	0	0	2	2
I-19	23.18	0.173	0	0	0	0	2	2	2	0	2	2	0	0	2	2	2	2	0	2	0	0	2	2	2	2	0	0	2	0	0	2	2	0	0	2	0	2	2	0	0	2	2	0	2	0	0	2	2
I-20	1	0.007	2	2	2	2	0	0	0	2	0	0	2	2	0	0	0	0	2	2	2	2	0	2	2	2	0	0	2	2	2	0	0	0	2	0	2	2	0	2	0	2	2	0	0	0	0	2	2
I-21	14.95	0.11	0	0	2	2	0	0	0	2	.	.	2	2	0	2	0	0	2	2	0	0	2	2	2	2	0	0	2	0	0	2	2	0	0	.	2	2	.	.	0	2	2	0	0	0	0	2	2
[truncated: 4,214 more columns]
