# Supplementary material for: Genotyping tools and resources to assess peanut germplasm: smut-resistant landraces as a case study
Source: PeerJ. 2021 Jan 29;9:e10581. doi: 10.7717/peerj.10581 (PMC7849506; doi:10.7717/peerj.10581)
Supplement: Supplemental Information 8 [file peerj-09-10581-s008.xlsx]

## Sheet: Sheet1
Chromosome	Number of SNPs
Arahy.01	939
Arahy.02	956
Arahy.03	804
Arahy.04	633
Arahy.05	595
Arahy.06	722
Arahy.07	583
Arahy.08	538
Arahy.09	736
Arahy.10	614
Arahy.11	557
Arahy.12	771
Arahy.13	644
Arahy.14	552
Arahy.15	591
Arahy.16	712
Arahy.17	729
Arahy.18	825
Arahy.19	971
Arahy.20	800
Scaffolds	26
Total	14298
