# Supplementary material for: Genotyping tools and resources to assess peanut germplasm: smut-resistant landraces as a case study
Source: PeerJ. 2021 Jan 29;9:e10581. doi: 10.7717/peerj.10581 (PMC7849506; doi:10.7717/peerj.10581)
Supplement: Supplemental Information 9 — SNP location is based on both, the A. hypogaea cv. Tifrunner reference genome and Axiom Arachis2 SNP array. [file peerj-09-10581-s009.xlsx]

## Sheet: Sheet1
Probeset ID	Based on the Axiom Arachis2 48K SNP array (Clevenger et al. 2018)				Mapped to A. hypogaea cv. Tifrunner (https://peanutbase.org)
	Chromosme	Physical position (bp)	SNP target gene	Description	Chromosme	Physical position (bp)	Probeset target gene	Description
AX-147221290	Aradu.A04	120864978	Aradu.5YM1J	F-box and associated interaction domains-containing protein	Arahy.04	126269966..126270037	Arahy.EFML97	F-box and associated interaction domains-containing protein
AX-147221291	Aradu.A04	120865104	Aradu.5YM1J	F-box and associated interaction domains-containing protein	Arahy.04	126270092..126270163	Arahy.EFML97	F-box and associated interaction domains-containing protein
AX-176796229	Aradu.A04	120893074	intergenic
AX-147221305	Aradu.A04	120927787	Aradu.XV6T4	Disease resistance protein (TIR-NBS-LRR class) family
AX-147221309	Aradu.A04	120928421	Aradu.XV6T4	Disease resistance protein (TIR-NBS-LRR class) family	Arahy.04	126342229..126342300	intergenic	.
AX-147221310	Aradu.A04	120928690	Aradu.XV6T4	Disease resistance protein (TIR-NBS-LRR class) family
AX-147221312	Aradu.A04	120928865	Aradu.XV6T4	Disease resistance protein (TIR-NBS-LRR class) family	Arahy.04	126390082..126390153	intergenic	.
AX-176804758	Aradu.A04	120931918	intergenic		Arahy.04	126391995..126392066	Arahy.5S93BF	F-box and associated interaction domains-containing protein
AX-176823910	Aradu.A04	120931969	intergenic		Arahy.04	126392048..126392117	Arahy.5S93BF	F-box and associated interaction domains-containing protein
AX-176797867	Aradu.A04	120932316	intergenic		Arahy.04	126392394..126392464	Arahy.5S93BF	F-box and associated interaction domains-containing protein
AX-176810578	Aradu.A04	120936776	Aradu.JXM0I	F-box and associated interaction domains-containing protein
AX-176797003	Aradu.A04	120937329	intergenic
AX-176797345	Aradu.A04	120974661	intergenic		Arahy.04	126425260..126425331	Arahy.AE3Y24	F-box and associated interaction domains-containing protein
AX-147221326	Aradu.A04	121040266	Aradu.WU1XZ	ADP-ribosylation factor GTPase-activating protein AGD3-like	Arahy.04	126539825..126539896	Arahy.UP9I24	ADP-ribosylation factor GTPase-activating protein AGD3-like
AX-147221330	Aradu.A04	121041531	Aradu.WU1XZ	ADP-ribosylation factor GTPase-activating protein AGD3-like	Arahy.04	126541088..126541159	Arahy.UP9I25	ADP-ribosylation factor GTPase-activating protein AGD3-like
AX-147221331	Aradu.A04	121067694	Aradu.ZU8HW	C-terminal domain phosphatase-like 3	Arahy.04	126572133..126572204	Arahy.W5XP03	C-terminal domain phosphatase-like 3
AX-147221332	Aradu.A04	121110175	Aradu.47D44	histone-lysine N-methyltransferase EZA1-like isoform X6	Arahy.04	126618825..126618896	Arahy.NCWU1I	histone-lysine N-methyltransferase SUVR5-like isoform X2
AX-147221333	Aradu.A04	121110746	Aradu.47D44	histone-lysine N-methyltransferase EZA1-like isoform X6	Arahy.04	126619396..126619467	Arahy.NCWU1I	histone-lysine N-methyltransferase SUVR5-like isoform X3
AX-147221334	Aradu.A04	121111105	Aradu.47D44	histone-lysine N-methyltransferase EZA1-like isoform X6	Arahy.04	126619737..126619808	Arahy.NCWU1I	histone-lysine N-methyltransferase SUVR5-like isoform X4
AX-147221335	Aradu.A04	121111431	Aradu.47D44	histone-lysine N-methyltransferase EZA1-like isoform X6
AX-147221336	Aradu.A04	121114651	Aradu.47D44	histone-lysine N-methyltransferase EZA1-like isoform X6	Arahy.04	126623323..126623394	Arahy.NCWU1I	histone-lysine N-methyltransferase SUVR5-like isoform X6
AX-147221337	Aradu.A04	121114840	Aradu.47D44	histone-lysine N-methyltransferase EZA1-like isoform X6	Arahy.04	126623512..126623583	Arahy.NCWU1I	histone-lysine N-methyltransferase SUVR5-like isoform X7
AX-147221339	Aradu.A04	121121083	Aradu.NY1A5	WD repeat-containing protein 61-like	Arahy.04	126643146..126643217	Arahy.7L7952	WD repeat-containing protein 61-like
AX-147221340	Aradu.A04	121123731	Aradu.NY1A5	WD repeat-containing protein 61-like	Arahy.04	126645856..126645927	Arahy.7L7953	WD repeat-containing protein 61-like
AX-147221346	Aradu.A04	121138001	Aradu.M5317	Eukaryotic aspartyl protease family protein	Arahy.04	126660293..126660364	Arahy.6R3QEQ	Eukaryotic aspartyl protease family protein
AX-176799262	Aradu.A04	121138420	Aradu.M5317	Eukaryotic aspartyl protease family protein	Arahy.04	126660725..126660796	Arahy.6R3QEQ	Eukaryotic aspartyl protease family protein
AX-147221357	Aradu.A04	121155485	Aradu.83ZPC	Callose synthase	Arahy.04	126681380..126681451	Arahy.GLSV4T	Callose synthase
AX-147221361	Aradu.A04	121182715	Aradu.T04DC	Chitinase family protein	Arahy.04	126723543..126723614	Arahy.LGGY6H	Chitinase family protein
AX-147221363	Aradu.A04	121205425	Aradu.41CRM	aldo/keto reductase family oxidoreductase
AX-147221364	Aradu.A04	121205892	Aradu.41CRM	aldo/keto reductase family oxidoreductase
AX-147221369	Aradu.A04	121228311	Aradu.ZC28Q	aldo/keto reductase family oxidoreductase	Arahy.04	126773193..126773264	Arahy.QZYV06	aldo/keto reductase family oxidoreductase
AX-147221370	Aradu.A04	121228385	Aradu.ZC28Q	aldo/keto reductase family oxidoreductase	Arahy.04	126764635..126764700	Arahy.QZYV06	aldo/keto reductase family oxidoreductase
AX-147221372	Aradu.A04	121229546	Aradu.ZC28Q	aldo/keto reductase family oxidoreductase	Arahy.04	126774398..126774469	Arahy.QZYV06	aldo/keto reductase family oxidoreductase
AX-147221373	Aradu.A04	121229677	Aradu.ZC28Q	aldo/keto reductase family oxidoreductase
AX-147221378	Aradu.A04	121243975	Aradu.ZC28Q	aldo/keto reductase family oxidoreductase	Arahy.04	126786442..126786513	Arahy.QZYV06	aldo/keto reductase family oxidoreductase
AX-147248810	Araip.B04	130951335	Araip.34X53	F-box and associated interaction domains-containing protein
AX-176805289	Araip.B04	131084500	intergenic
AX-176793623	Araip.B04	131185279	Araip.FV7JG	F-box protein interaction domain protein
AX-147248831	Araip.B04	131269877	Araip.9J5CM	myb/SANT-like DNA-binding domain protein
AX-147248835	Araip.B04	131287386	Araip.J4V1E	Protein kinase superfamily protein	Arahy.14	140982868..140982939	Arahy.5FYJ3P	Protein kinase superfamily protein
AX-176791380	Araip.B04	131369085	Araip.1M1VI	histone-lysine N-methyltransferase EZA1-like isoform X6	Arahy.14	141058127..141058198	Arahy.631JZ3	histone-lysine N-methyltransferase EZA1-like isoform X6
AX-147248848	Araip.B04	131447709	Araip.TQ2BR	disease resistance protein	Arahy.14	141141034..141141105	Arahy.M6XMZZ	disease resistance protein
AX-147248853	Araip.B04	131451694	Araip.4CC02	Protein phosphatase 2C family protein	Arahy.14	141145210..141145281	Arahy.L3E896	Protein phosphatase 2C family protein
AX-147248854	Araip.B04	131462529	Araip.0MK02	Chitinase family protein
AX-147248859	Araip.B04	131518448	Araip.DAU5G	aldo/keto reductase family oxidoreductase
