# Supplementary material for: Genotyping tools and resources to assess peanut germplasm: smut-resistant landraces as a case study
Source: PeerJ. 2021 Jan 29;9:e10581. doi: 10.7717/peerj.10581 (PMC7849506; doi:10.7717/peerj.10581)
Supplement: Supplemental Information 11 — SNP physical location is based on the A. hypogaea cv. Tifrunner reference genome. [file peerj-09-10581-s011.xlsx]

## Sheet: Sheet1
Axiom Arachis2 SNP ID	Incidence P-value	Disease index P-value	Chromosome	Physical position (bp)
AX-177643001	0.00306386	0.00539583	Arahy.19	327,082..327,153
AX-147259639	0.00306386	0.00539583	Arahy.19	478,491..478,562
AX-177638329	0.00306386	0.00539583	Arahy.19	518,411..518,482
AX-177644036	0.00306386	0.00539583	Arahy.19	595,414..595,485
AX-177642482	0.00306386	0.00539583	Arahy.19	784,549..784,620
AX-147216300	0.00559205	0.00760996	Arahy.03	23,550,816..23,550,887
AX-147244129	0.00559205	0.00760996	Arahy.13	24,673,399..24,673,470
AX-176791379	0.014953	0.0198479	Arahy.13	27,234,348..27,234,419
AX-147244226	0.014953	0.0198479	Arahy.13	28,484,194..28,484,262
AX-147244277	0.014953	0.0198479	Arahy.13	29,717,166..29,717,237
AX-147244292	0.014953	0.0198479	Arahy.13	30,338,547..30,338,618
AX-176816134	0.014953	0.0198479	Arahy.13	29,541,607..29,541,676
AX-176821705	0.014953	0.0198479	Arahy.13	29,665,334..29,665,401
AX-147232553	0.0184593	0.0166822	Arahy.09	6,953,791..6,953,861
AX-147232560	0.0184593	0.0166822	Arahy.09	7,348,279..7,348,350
AX-177642365	0.0263638	0.0239613	Arahy.19	8,383,600..8,383,671
AX-176805643	0.0357109	0.0333204	Arahy.19	9,467,358..9,467,429
AX-176809180	0.0357109	0.0333204	Arahy.19	8,998,186..8,998,257
AX-147256944	0.0456647	.	Arahy.18	1,180,332..1,180,403
AX-147256945	0.0456647	.	Arahy.18	1,180,436..1,180,507
AX-176791695	0.0456647	.	Arahy.18	963,184..963,254
AX-176802467	.	0.0456191	Arahy.05	44,202,546..44,202,615
